# Supplementary material for: MUSCLE: a multiple sequence alignment method with reduced time and space complexity
Source: Springer Nature journal article supplement (doi:10.1186/1471-2105-5-113), 2004-08-19
Supplement: 12859_2004_229_MOESM9_ESM.pdf [file 12859_2004_229_MOESM9_ESM.pdf]

$$(1) \quad \langle 3, -1, 2 \rangle (\text{MQTIF}) = \text{MQT-IF}$$

$$(2) \quad \langle 1, -1, 5 \rangle (\langle 3, -1, 2 \rangle (\text{MQTIF})) \\ = \langle 1, -1, 5 \rangle (\text{MQT-IF}) \\ = \text{M-QT-IF} \\ = \langle 1, -1, 2, -1, 2 \rangle (\text{MQTIF})$$

$$(3) \quad \langle 1, -1, 5 \rangle * \langle 3, -1, 2 \rangle = \langle 1, -1, 2, -1, 2 \rangle$$

$$(4) \quad \langle \text{MDMI MM} \rangle \\ \text{MQT-IF} \quad \langle 3, -1, 2 \rangle \\ \text{M-TAIF} \quad \langle 1, -1, 4 \rangle$$
