# Supplementary material for: MUSCLE: a multiple sequence alignment method with reduced time and space complexity
Source: Springer Nature journal article supplement (doi:10.1186/1471-2105-5-113), 2004-08-19
Supplement: 12859_2004_229_MOESM11_ESM.pdf [file 12859_2004_229_MOESM11_ESM.pdf]

external indels  
relative to  $(s, u)$

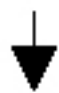

|          |   |   |   |   |   |   |   |   |   |   |   |   |   |   |   |   |   |
|----------|---|---|---|---|---|---|---|---|---|---|---|---|---|---|---|---|---|
| <i>s</i> | S | E | Q | - | E | N | C | E | - | - | - | - | C | T | M |   |   |
| <i>t</i> | T | E | H | - | E | N | C | D | I | N | S | E | R | T | C | T | M |
| <i>u</i> | S | E | Q | V | E | N | C | E | I | N | S | E | R | T | C | T | M |

X-  
X-

No penalty.

Gap-open.

X-  
XX

Gap-close.

-X  
XX

--  
XX

Gap-extend.
