# Supplementary material for: MUSCLE: a multiple sequence alignment method with reduced time and space complexity
Source: Springer Nature journal article supplement (doi:10.1186/1471-2105-5-113), 2004-08-19
Supplement: 12859_2004_229_MOESM13_ESM.pdf [file 12859_2004_229_MOESM13_ESM.pdf]

|    |    |    |    |    |
|----|----|----|----|----|
| XX | 0  |    |    |    |
| X- | g  | 0  |    |    |
| -X | 0  | g  | 0  |    |
| -- | e  | 0  | tg | 0  |
|    | XX | X- | -X | -- |
