# Supplementary figures and images for: MUSCLE: a multiple sequence alignment method with reduced time and space complexity
Source: Springer Nature journal article supplement (doi:10.1186/1471-2105-5-113), 2004-08-19

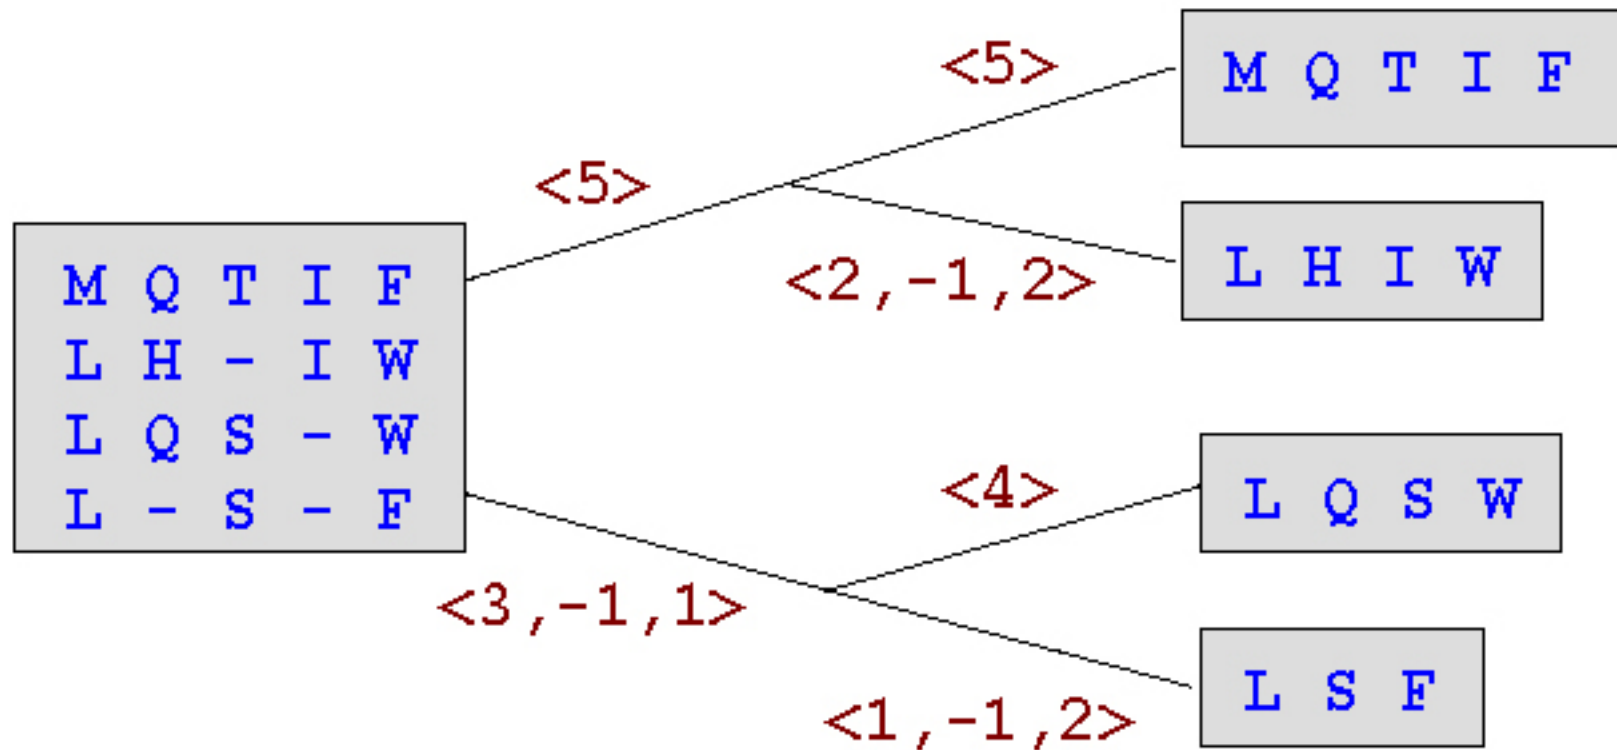

Supplement: 12859_2004_229_MOESM10_ESM.pdf [file 12859_2004_229_MOESM10_ESM.pdf]

external indels

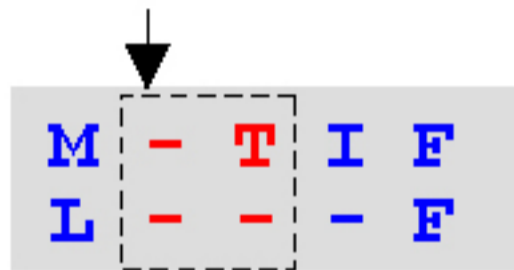

Gap open

external indels

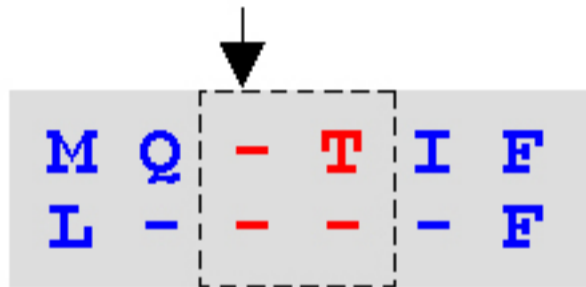

Gap extend

Supplement: 12859_2004_229_MOESM12_ESM.pdf [file 12859_2004_229_MOESM12_ESM.pdf]

Seconds

10000

1000

100

10

1

200

400

600

800

1000

Number of sequences

- POA
- CLUSTALW
- △— MUSCLE
- △— MUSCLE-prog
- ◇— FFTNS1
- △— MUSCLE-fast

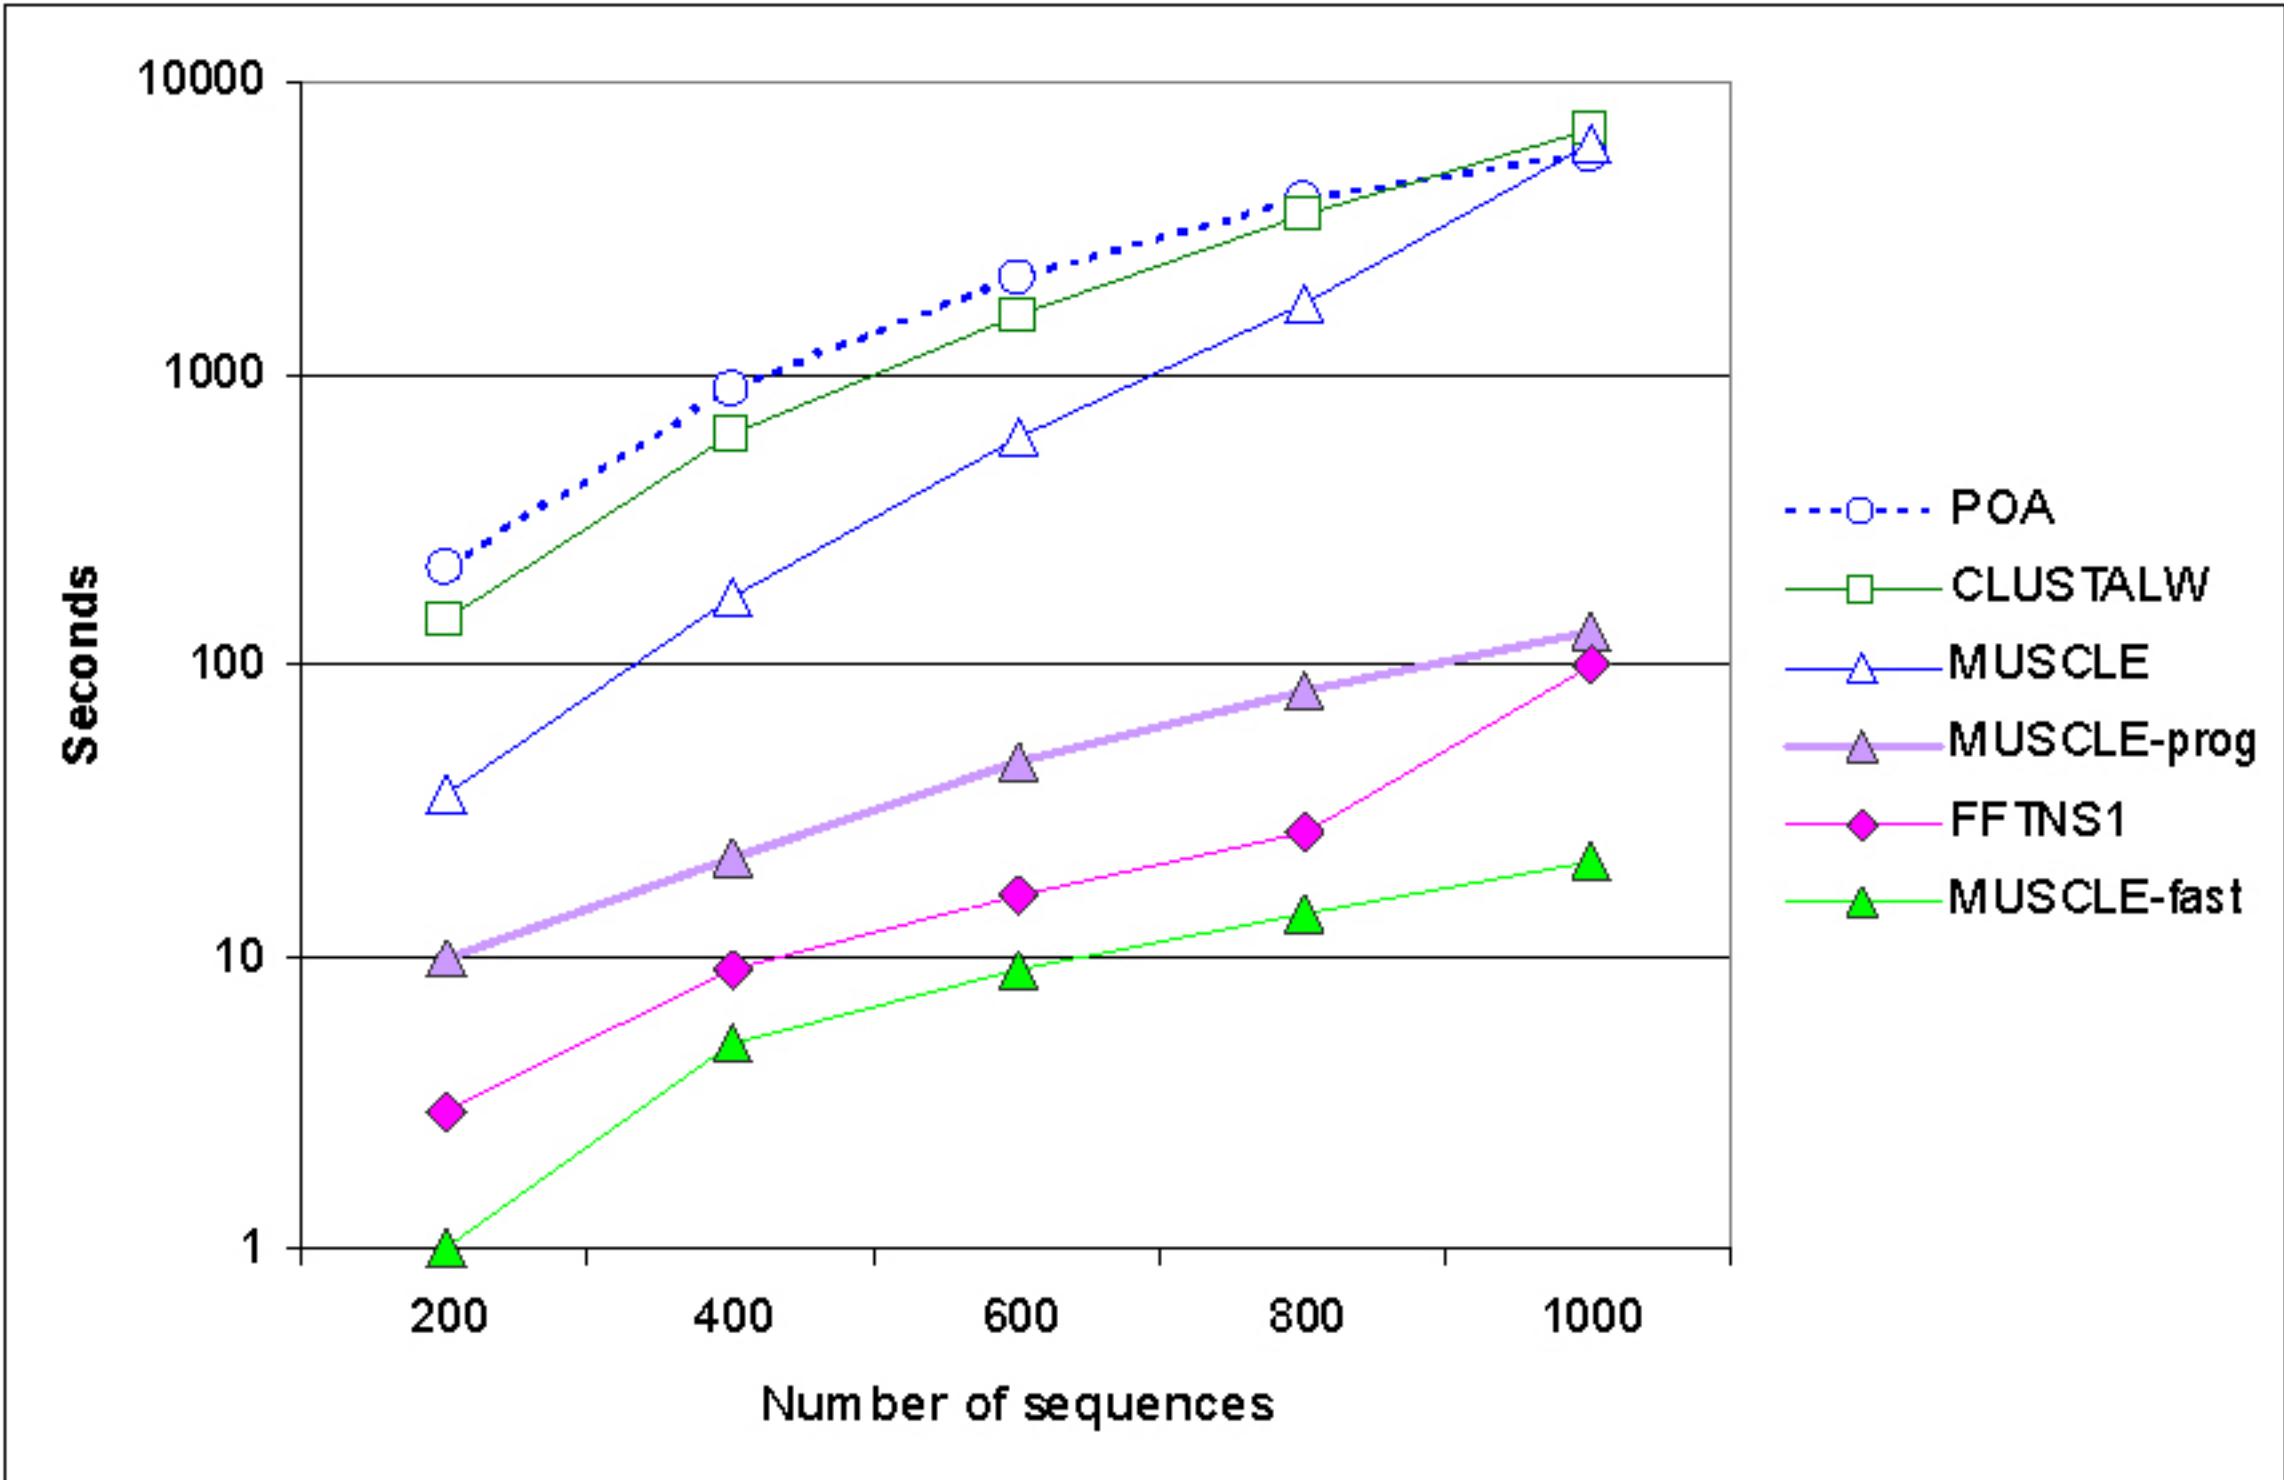

Supplement: 12859_2004_229_MOESM16_ESM.pdf [file 12859_2004_229_MOESM16_ESM.pdf]

external indels relative to  $(s, t)$

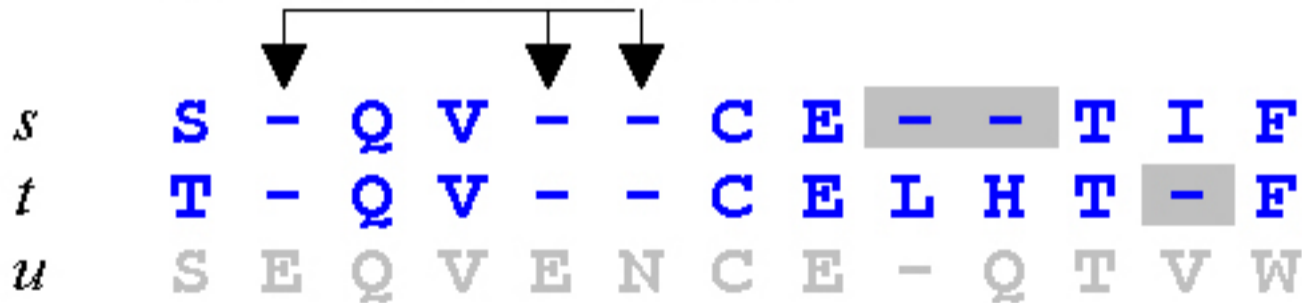

Supplement: 12859_2004_229_MOESM3_ESM.pdf [file 12859_2004_229_MOESM3_ESM.pdf]

$b(x)$ , gap-open penalty

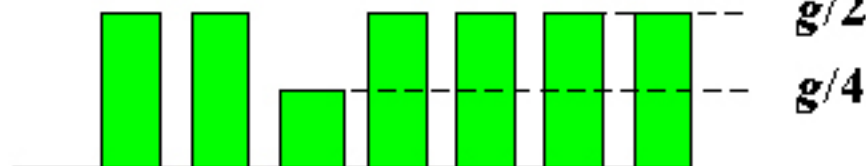

$f(x)$ , gap-close penalty

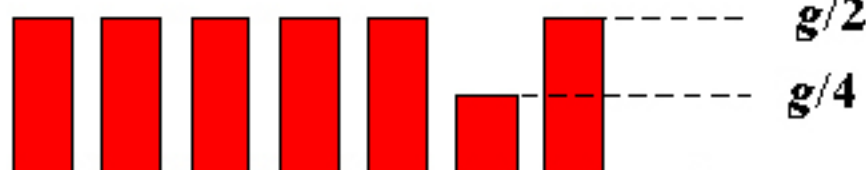

$X$

$s$

**S E Q V E N C E**

$t$

**S D Q - - C E**

$u$

**S E H - - C D**

$v$

**T E Q V E N C E**

$Y$

$w$

**T E H - - - C E**

Supplement: 12859_2004_229_MOESM4_ESM.pdf [file 12859_2004_229_MOESM4_ESM.pdf]

$$n_F^X = 1, n_W^X = 2$$

$$f_F^X = 1/3, f_W^X = 2/3$$

**X**

|   |   |   |   |
|---|---|---|---|
| M | Q | T | F |
| L | H | T | W |
| L | Q | S | W |

**Y**

|   |   |   |   |
|---|---|---|---|
| L | T | I | F |
| M | T | I | W |

$$n_F^Y = 1, n_W^Y = 1$$

$$f_F^Y = 1/2, f_W^Y = 1/2$$

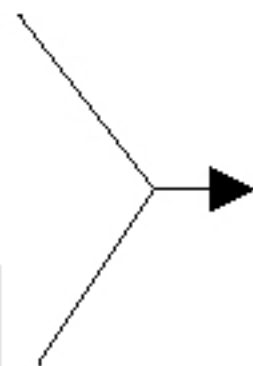

**Z**

|   |   |   |   |   |
|---|---|---|---|---|
| M | Q | T | - | F |
| L | H | T | - | W |
| L | Q | S | - | W |
| L | - | T | I | F |
| M | - | T | I | W |

$$n_F^Z = 2, n_W^Z = 3$$

$$f_F^Z = 2/5, f_W^Z = 3/5$$

Supplement: 12859_2004_229_MOESM7_ESM.pdf [file 12859_2004_229_MOESM7_ESM.pdf]

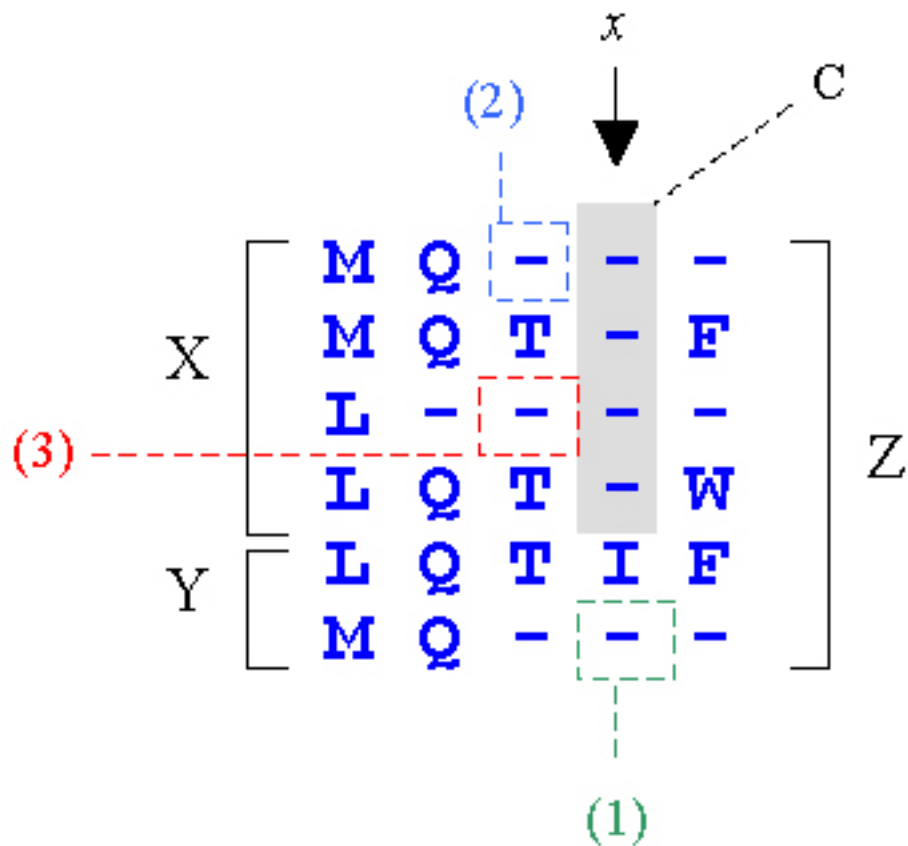

Supplement: 12859_2004_229_MOESM8_ESM.pdf [file 12859_2004_229_MOESM8_ESM.pdf]
